# Supplementary material for: Hydroxyl-Functionalized Covalent Organic Frameworks as High-Performance Supercapacitors
Source: MDPI journal article supplement (doi:10.3390/polym14163428), 2022-08-22
Supplement: s1 [file s1]

*Electronic Supplementary Information (ESI)*

# Hydroxyl-Functionalized Covalent Organic Frameworks as High-Performance Supercapacitors

Tzu-Ling Yang <sup>1</sup>, Jhu-You Chen <sup>1</sup>, Shiao-Wei Kuo <sup>1</sup>, Chen-Tsyr Lo <sup>2,\*</sup> and Ahmed F. M. EL-Mahdy <sup>1,3,\*</sup>

<sup>1</sup> Department of Materials and Optoelectronic Science, National Sun Yat-Sen University, Kaohsiung 80424, Taiwan

<sup>2</sup> Department of Material Science and Engineering, National Taiwan University of Science and Technology, Taipei 10617, Taiwan

<sup>3</sup> Chemistry Department, Faculty of Science, Assiut University, Assiut 71516, Egypt

\* Correspondence: lochentsyr@mail.ntust.edu.tw (C.-T.L.); ahmedelmahdy@mail.nsysu.edu.tw (A.F.M.E.-M.); Tel.: +886-2-2737-6527 (C.-T.L.); +886-7-5252-000 (ext. 4002) (A.F.M.E.-M.)

## S1. Materials

2,3-Dihydroxynaphthalene, 2,6-dihydroxynaphthalene, 4-bromoaniline, potassium carbonate, and formamidine were received from Acros. Acetic anhydride, HCl, and triflic acid were ordered from Alfa Aesar. Dioxane, chloroform, *n*-butanol and *o*-dichlorobenzene, acetic acid, DMF, THF, and acetone were obtained from J. T. Baker. Raw chemical materials and solvents were purchased from commercial resources and then used as they were.

## S2. Characterization

A Bruker Tensor 27 FTIR spectrophotometer was used to measure FTIR spectra via KBr disk method; every scan was recorded by a 4 cm<sup>-1</sup> resolution range. An INOVA 500 instrument was employed for recording <sup>13</sup>C NMR and <sup>1</sup>H spectra by DMSO-*d*<sub>6</sub> and CDCl<sub>3</sub> as solvents and tetramethylesilane (TMS) as exterior standard. Chemical shifts were recorded by a part per million (ppm) scale. A Bruker Avance 400 NMR spectrometer in addition to a Bruker magic-angle-spinning (MAS) sensor were applied for recording the solid state nuclear magnetic resonance (SSNMR) spectra. <sup>13</sup>C NMR spectral information was registered at 75.5 MHz via cross-polarization with MAS (CPMAS). The CP contact time was 2 ms, while data acquiring <sup>1</sup>H decoupling was applied by a decoupling frequency of 32 KHz and an MAS sample spinning rate of 10 kHz. Nitrogen adsorption-desorption measurements were carried out using a BelSorp max instrument. Before measuring the gas adsorption, the as-prepared samples (50 mg) were washed with anhydrous tetrahydrofuran for 24 hours using Soxhlet extraction. The solvent was filtered, and the samples were activated for 10 hours under pressure at 150 °C. The samples were then used for gas adsorption-desorption measurements at 77 K from 0 to 1 atm. Their specific surface areas were calculated using the Brunauer-Emmett-Teller (BET) methodology. The pore distributions were calculated from the sorption data using the quenched solid state density functional theory. TA Q-50 analyzer under a flow of N<sub>2</sub>, TGA data were examined. In a well-sealed Pt cell and under a nitrogen flow rate of 50 mL min<sup>-1</sup>; samples were exposed to increasing heat from 40 to 800 °C, at heating ramp 20 °C min<sup>-1</sup>. A JEOL JSM-7610F scanning electron microscope was used for visualization of FE-SEM, and samples were exposed to Pt sputtering for 100 s for handling observation. A JEOL-2100 scanning electron microscope, operated at 200 kV, was used for TEM images.

## S3. Synthetic Procedure of Monomers

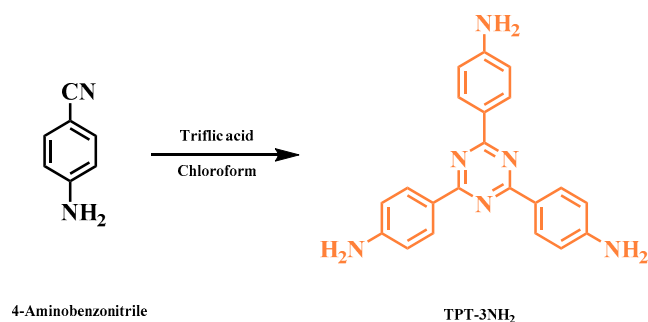

**Scheme S1.** Synthesis of 1,3,5-tris-(4-aminophenyl)triazine (TPT-3NH<sub>2</sub>).

**1,3,5-Tris-(4-aminophenyl)triazine (TPT-3NH<sub>2</sub>)** : A solution of 4-aminobenzonitrile (3.09 g, 26.1 mmol) in CHCl<sub>3</sub> (40 mL) was placed in a round-bottom flask at 0 °C. TfOH (8.00 mL, 30.4 mmol) was added dropwise over 15 minutes while maintaining the temperature at 0 °C. The mixture was stirred at room temperature for 24 h under an N<sub>2</sub> atmosphere. Ice-cooled distilled H<sub>2</sub>O (50 mL) was added and then the mixture was neutralized by adding 2 M NH<sub>4</sub>OH until the pH exceeded 7. Initially, upon increasing pH, the orange precipitate dissolved to give a bright-orange solution. A further increase in pH provided a pale-yellow precipitate, which was filtered off and then washed three times with distilled H<sub>2</sub>O and MeOH. The solvent was evaporated slowly through using vacuum

2,3-Dihydroxynaphthalene

FA, AC<sub>2</sub>O, dioxane  
H<sub>2</sub>O, HCl

2,3-NADC

**2,3-Dihydroxynaphthalene-1,4-dicarbaldehyde (2,3-NADC):** Formamidine acetate (1.56 g, 14.98 mmol) and dioxane (30 mL) were added into a 100-mL two-neck round-bottom flask and heated under reflux. Acetic anhydride (3mL) was added when the target temperature reached 95 °C and was then stirred for 30 minutes. 2,3-Dihydroxynaphthalene (300 mg, 1.87 mmol) was added once all formamidine acetate was dissolved, and kept for two days. After cooling for minutes, dioxane was evaporated at 50 °C, was added H<sub>2</sub>O (45mL), and heated at 65 °C for 2 hours. Thereafter, we added HCl (1 M, 40 mL) and kept heating at 65 °C for 18 hours. The solid was filtered and washed several times with hexane. 2,3-Dihydroxynaphthalene-1,4-dicarbaldehyde was obtained after purifying by using column chromatography with THF/hexane as eluent (303 mg, 75% yield). FTIR: 3380, 2890-2965, and 1674 cm<sup>-1</sup>. <sup>1</sup>H NMR (DMSO-*d*<sub>6</sub>, 25 °C, 500 MHz) δ (ppm): 10.68 (s, 2H), 8.29 (d, *J* = 13.0 Hz, 2H), and 7.38 (d, *J* = 13.0 Hz, 2H). <sup>13</sup>C NMR (DMSO-*d*<sub>6</sub>, 25 °C, 125 MHz) δ (ppm): 195.31, 155.0, 127.13, 125.77, 123.21, and 117.76.

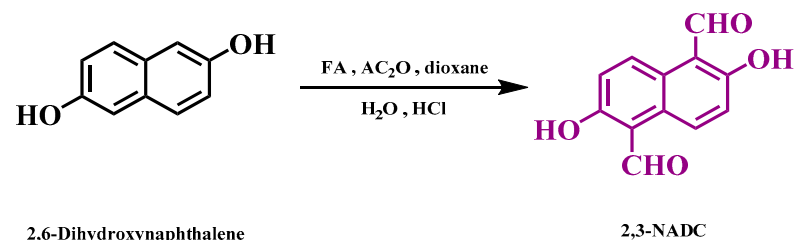

**2,6-dihydroxynaphthalene-1,5-dicarbaldehyde (2,6-NADC):** Formamidinium acetate (1.56 g, 14.98 mmol) and dioxane (45 mL) were heated under reflux in a 100-mL two-neck round-bottom flask. Acetic anhydride (3mL) was added when the target temperature reached 95 °C and stirred for thirty minutes. 2,6-Dihydroxynaphthalene (300 mg, 1.87 mmol) was added once all formamidinium acetate was dissolved and kept for two days. After cooling for minutes, dioxane was evaporated at 50 °C, was added H<sub>2</sub>O (45mL) and was heated at 65 °C for 2 hours. Thereafter, we added HCl (1 M, 45 mL) and kept heating at 65 °C for 18 hours. The solid was filtered and washed several times with hexane. 2,6-Dihydroxynaphthalene-1,5-dicarbaldehyde was obtained after purifying by using column chromatography with THF/hexane as eluent (291 mg, 72% yield). FTIR: 3445, 2852-2996, 3058, and 1640 cm<sup>-1</sup>. <sup>1</sup>H NMR (DMSO-*d*<sub>6</sub>, 25 °C, 500 MHz) δ (ppm): 10.75 (s, 2H), 9.14 (d, *J* = 12 Hz, 2H), and 7.32 (d, *J* = 12 Hz, 2H). <sup>13</sup>C NMR (DMSO-*d*<sub>6</sub>, 25 °C, 125 MHz) δ (ppm): 193.81, 162.35, 133.05, 126.43, 121.93, and 113.92.

#### S4. Synthetic Procedure of COFs

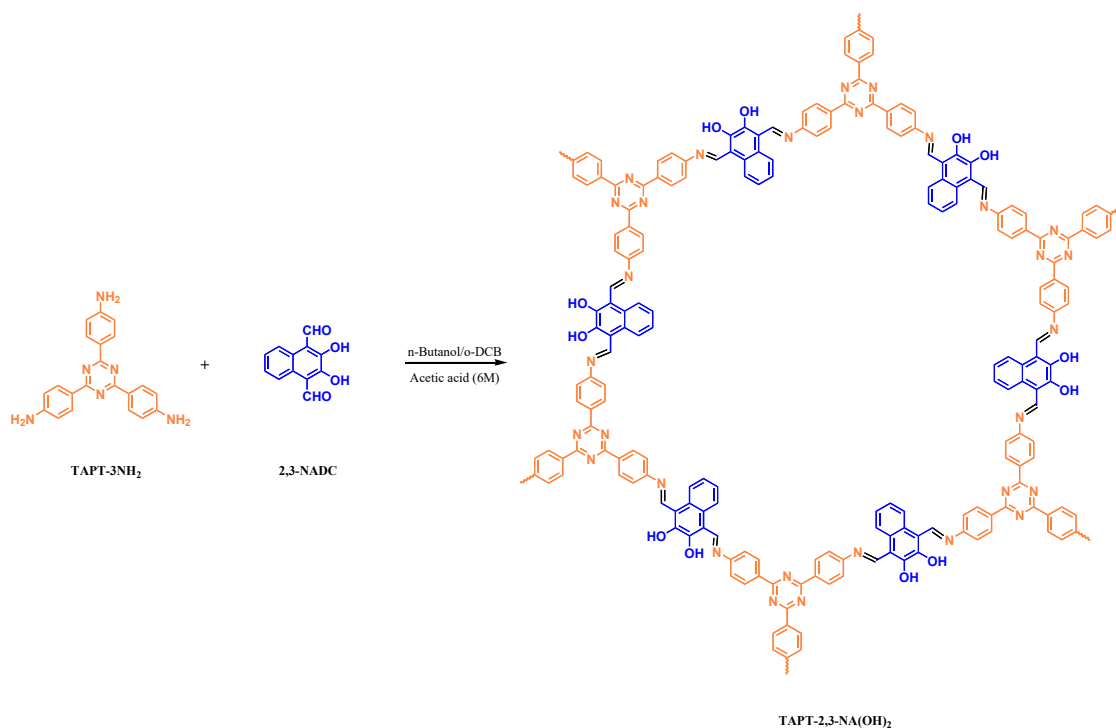

**Scheme S4.** Synthesis of TAPT-2,3-NA(OH)<sub>2</sub> COF.

**TAPT-2,3-NA(OH)<sub>2</sub> COF:** Three freeze/pump/thaw cycles were used to degas a solution of TAPT-3NH<sub>2</sub> (70.0 mg, 0.196 mmol) and 2,3-NADC (64.1 mg, 0.296 mmol) in n-butanol (3.5 mL) and o-dichlorobenzene (3.5 mL) with acetic acid (6 M, 0.7 mL) in a 25-mL Schlenk storage tube. The tube was then flame-sealed and heated at 120 °C for three days. After the tube had cooled to room temperature, the precipitate was filtered and washed (once with DMF, three times each with THF and acetone). The solid was vacuum-dried overnight at 120 °C to provide the TAPT-2,3-NA(OH)<sub>2</sub> COF as a red-brown powder (172 mg, 84% yield).

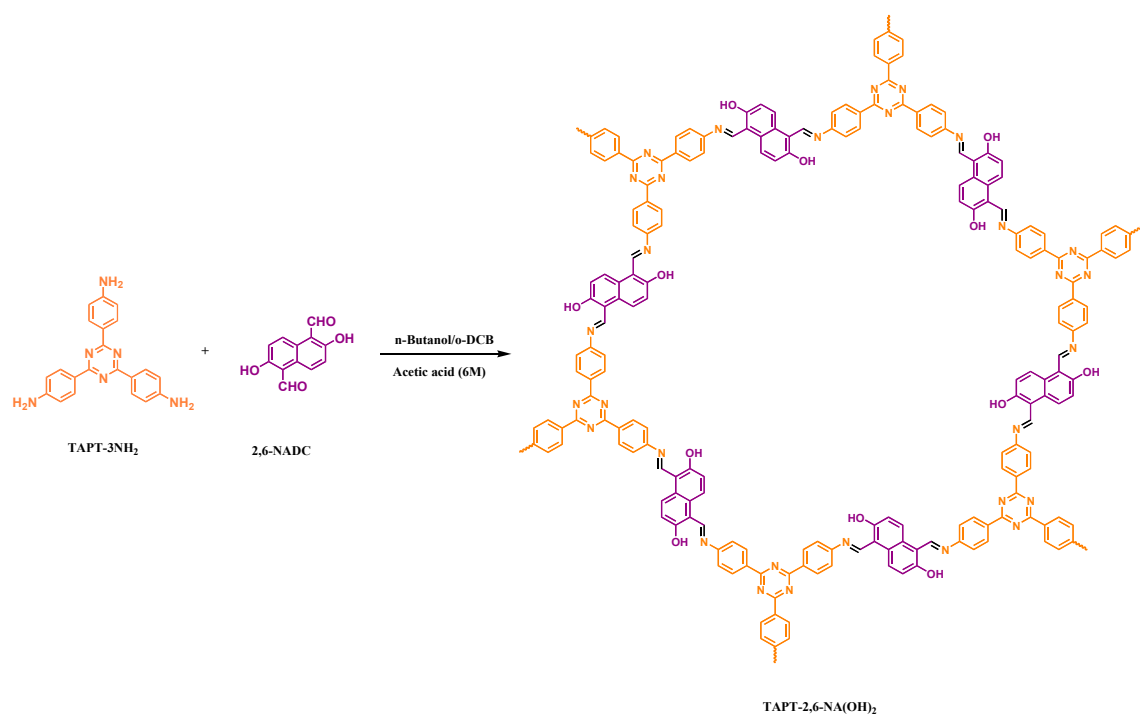

**Scheme S5.** Synthesis of TAPT-2,6-NA(OH)<sub>2</sub> COF.

**TAPT-2,6-NA(OH)<sub>2</sub> COF:** Three freeze/pump/thaw cycles were used to degas a solution of TAPT-3NH<sub>2</sub> (70.0 mg, 0.196 mmol) and 2,6-NADC (64.6 mg, 0.299 mmol) in n-butanol (3.5 mL) and o-dichlorobenzene (3.5 mL) with acetic acid (6 M, 0.7 mL) in a 25-mL Schlenk storage tube. The tube was flame-sealed and heated at 120 °C for three days. After the tube had cooled to room temperature, the precipitate was filtered and washed (once with DMF, three times each with THF and acetone). The solid was vacuum-dried overnight at 120 °C to get the TAPT-2,6-NA(OH)<sub>2</sub> COF as a red-brown powder (176 mg, 86% yield).

## S5. FTIR and NMR Spectral Profiles of Monomers

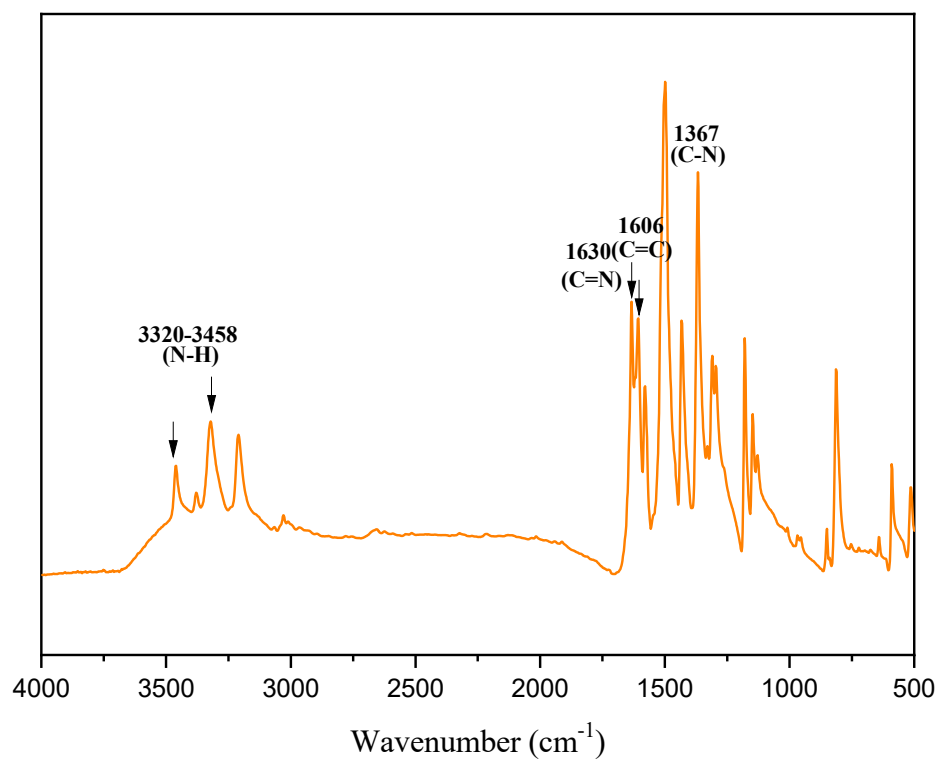

**Figure S1.** FT-IR spectrum of 1,3,5-tris-(4-aminophenyl)triazine.

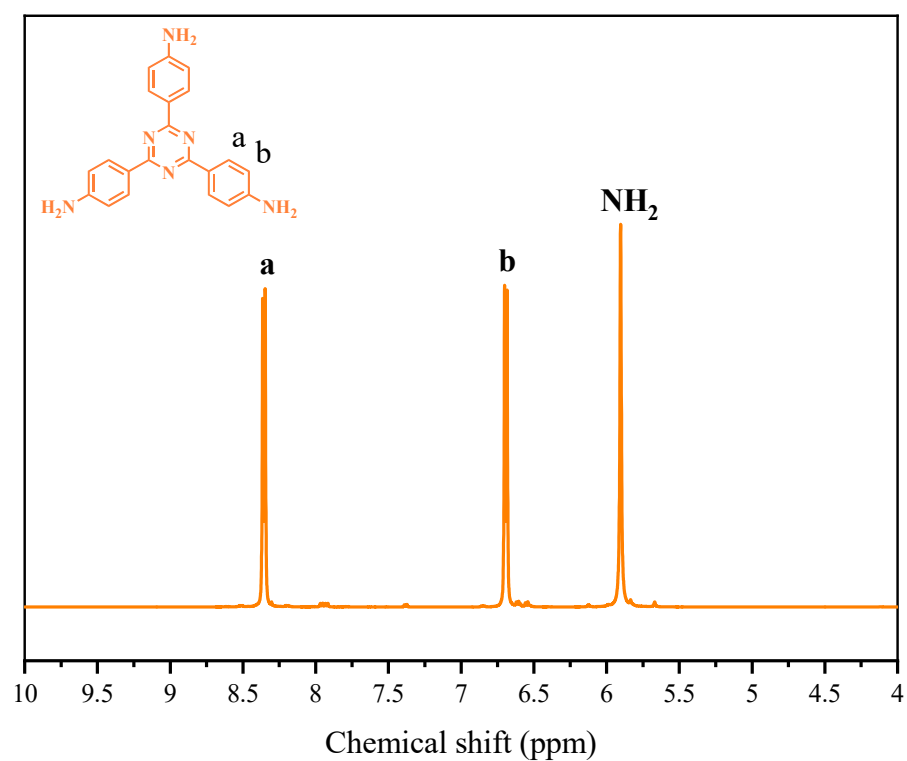

**Figure S2.** <sup>1</sup>H-NMR of 1,3,5-tris-(4-aminophenyl)triazine.

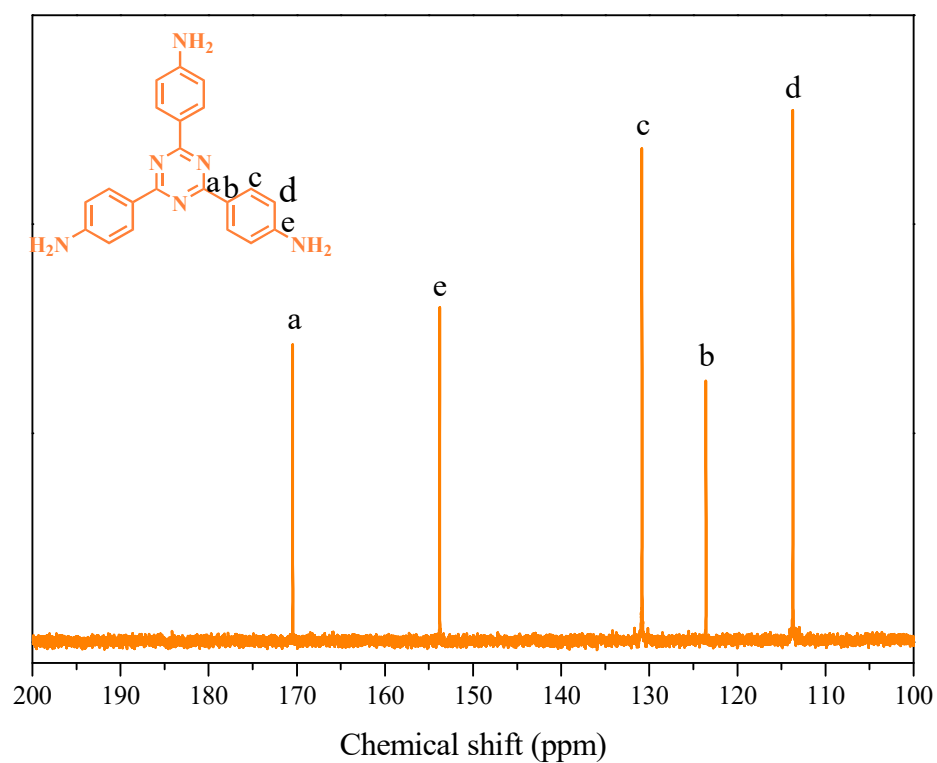

**Figure S3.**  $^{13}\text{C}$ -NMR of 1,3,5-tris-(4-aminophenyl)triazine.

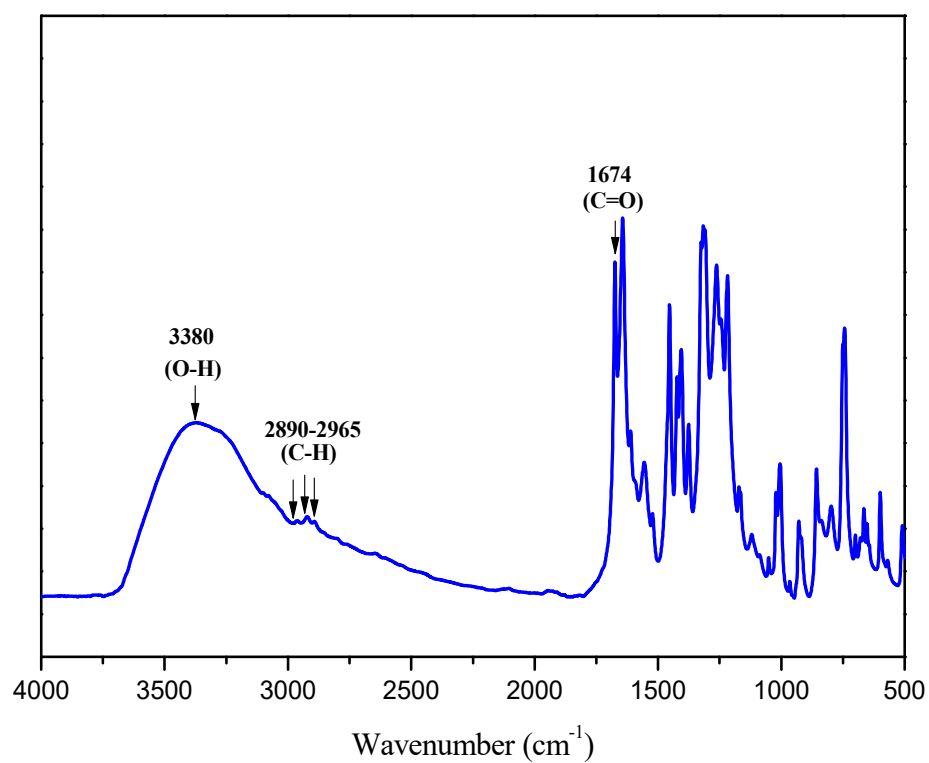

**Figure S4.** FT-IR spectrum of 2,3-dihydroxynaphthalene-1,4-dicarbaldehyde.

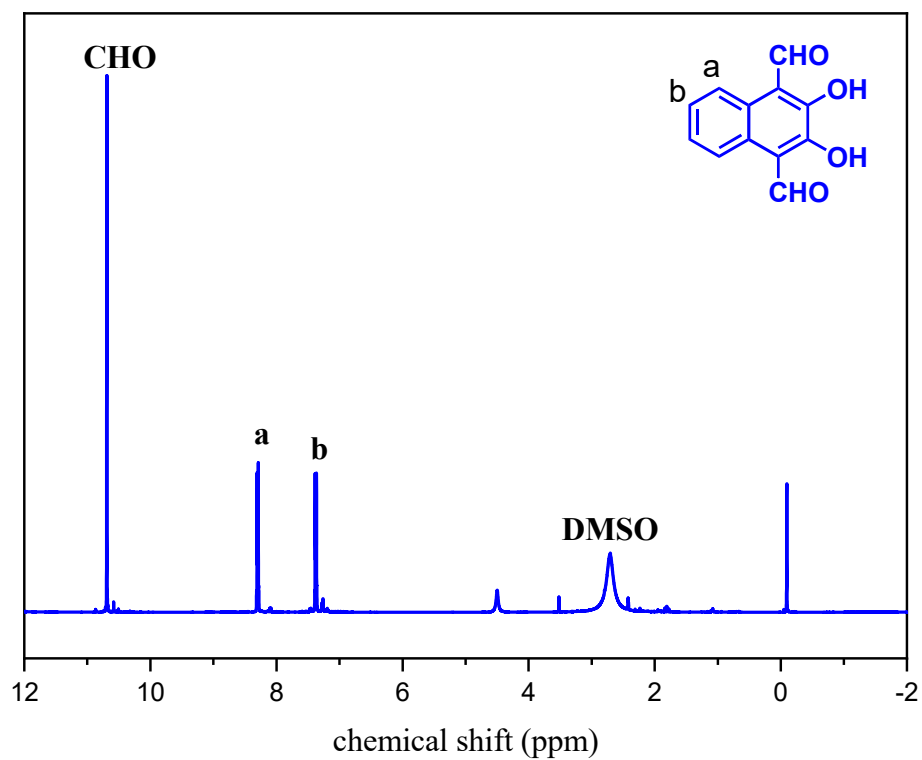

**Figure S5.** <sup>1</sup>H-NMR of 2,3-dihydroxynaphthalene-1,4-dicarbaldehyde.

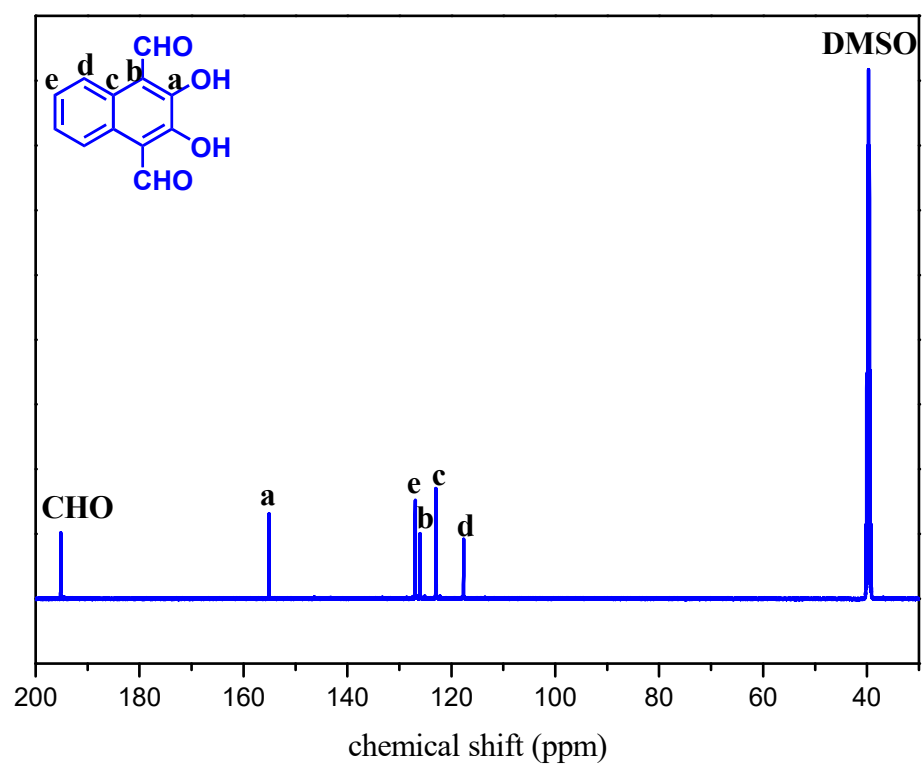

**Figure S6.** <sup>13</sup>C-NMR of 2,3-dihydroxynaphthalene-1,4-dicarbaldehyde.



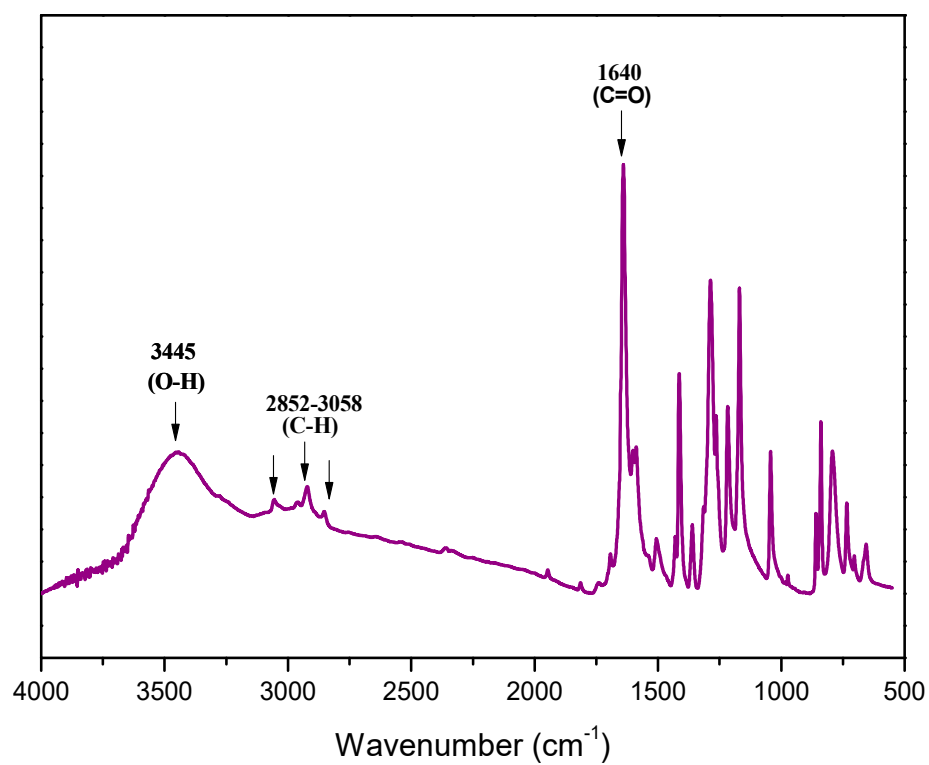

**Figure S7.** FT-IR spectrum of 2,6-dihydroxynaphthalene-1,5-dicarbaldehyde.

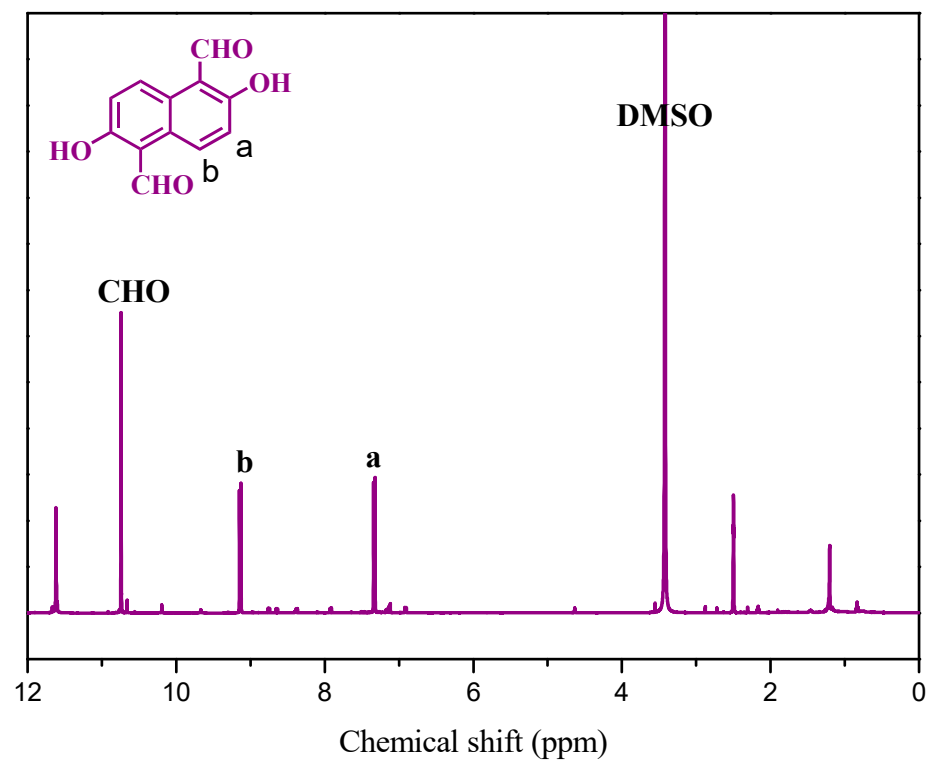

**Figure S8.**  $^1\text{H}$ -NMR of 2,6-dihydroxynaphthalene-1,5-dicarbaldehyde.

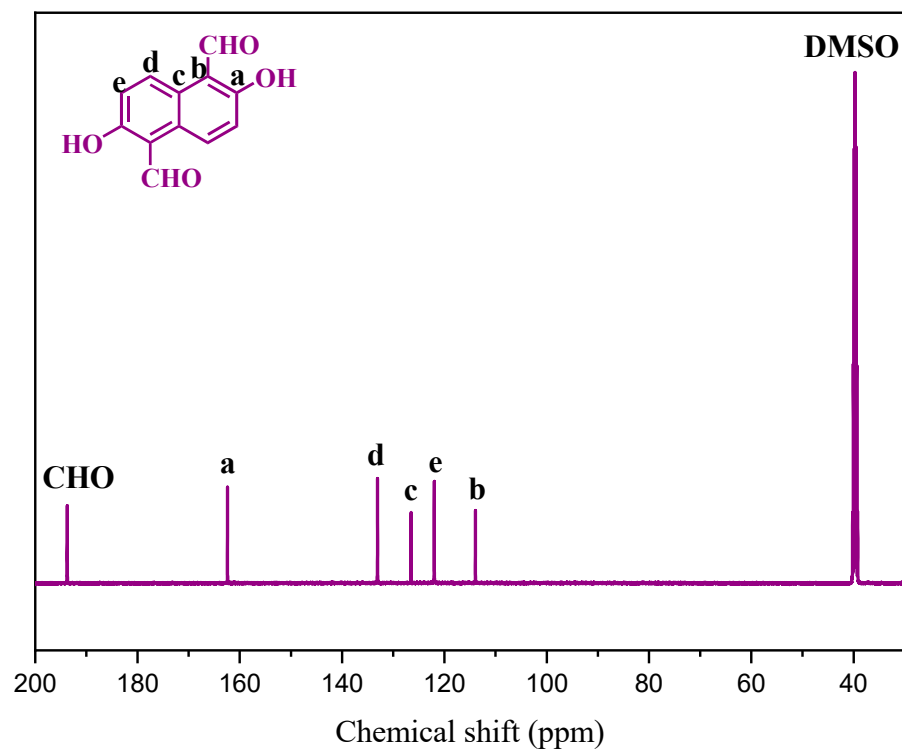

**Figure S9.**  $^{13}\text{C}$ -NMR of 2,6-dihydroxynaphthalene-1,5-dicarbaldehyde.

#### S6. PXRD data and BET parameters

**Table S1.** PXRD data and BET parameters of the synthesized TAPT-2,3-NA(OH) $_2$ , TAPT-2,6-NA(OH) $_2$  COFs.

| COFs                 | $S_{\text{BET}}$<br>( $\text{m}^2 \text{g}^{-1}$ ) | $d_{110}$<br>(nm) | Pore size<br>(nm) | Interlayer dis-<br>tance ( $\text{\AA}$ ) | Pore<br>Volume ( $\text{cm}^3 \text{g}^{-1}$ ) |
|----------------------|----------------------------------------------------|-------------------|-------------------|-------------------------------------------|------------------------------------------------|
| TAPT-2,3-NA(OH) $_2$ | 429                                                | 3.76              | 3.04              | 3.96                                      | 0.17                                           |
| TAPT-2,6-NA(OH) $_2$ | 1089                                               | 3.78              | 3.29              | 3.94                                      | 0.22                                           |

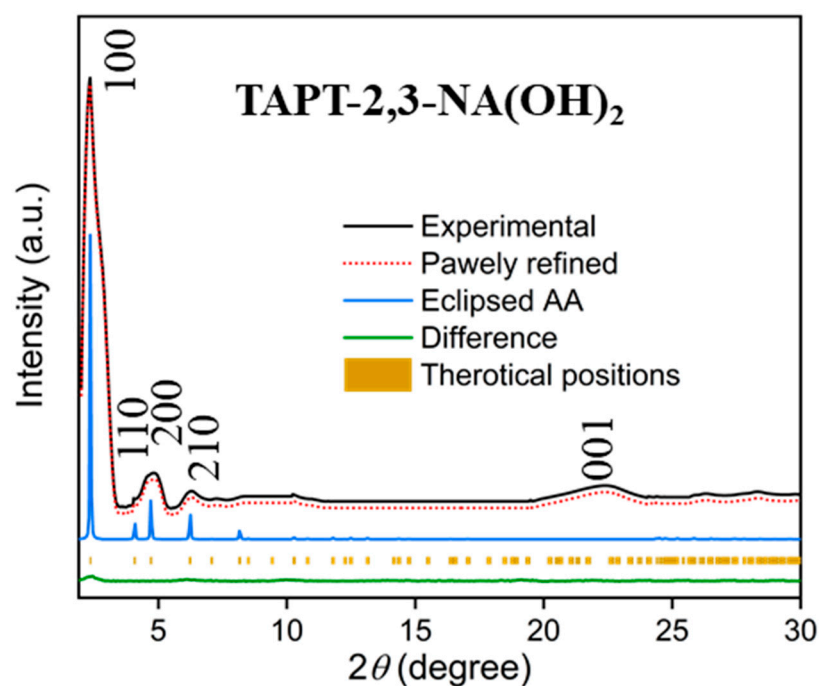

**Figure S10.** Experimental and simulated PXRD patterns of TAPT-2,3-NA(OH) $_2$  COF.

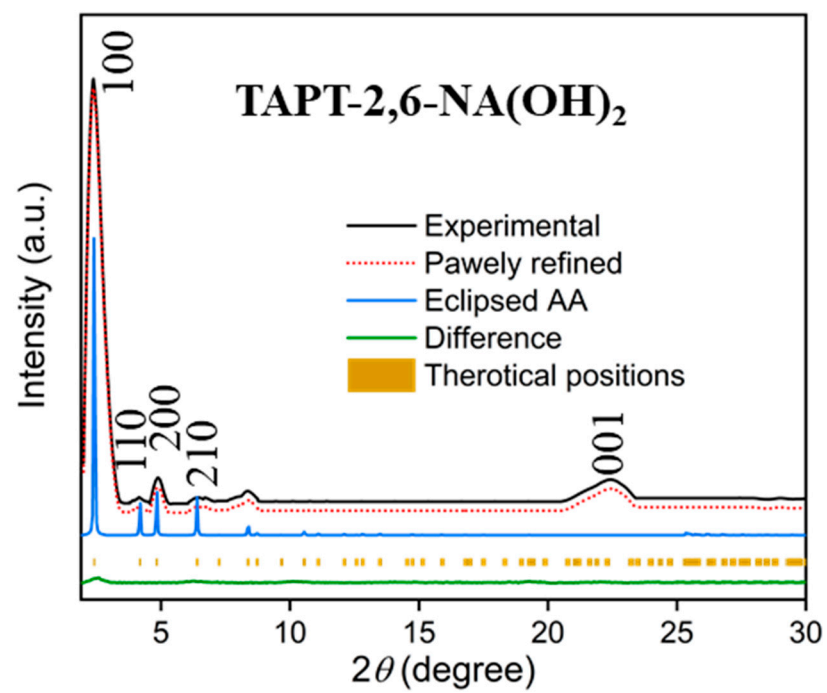

**Figure S11.** Experimental and simulated PXRD patterns of TAPT-2,6-NA(OH)<sub>2</sub> COF.

## S7. Structural Modeling and Fractional Atomic Coordinates for COF Structures

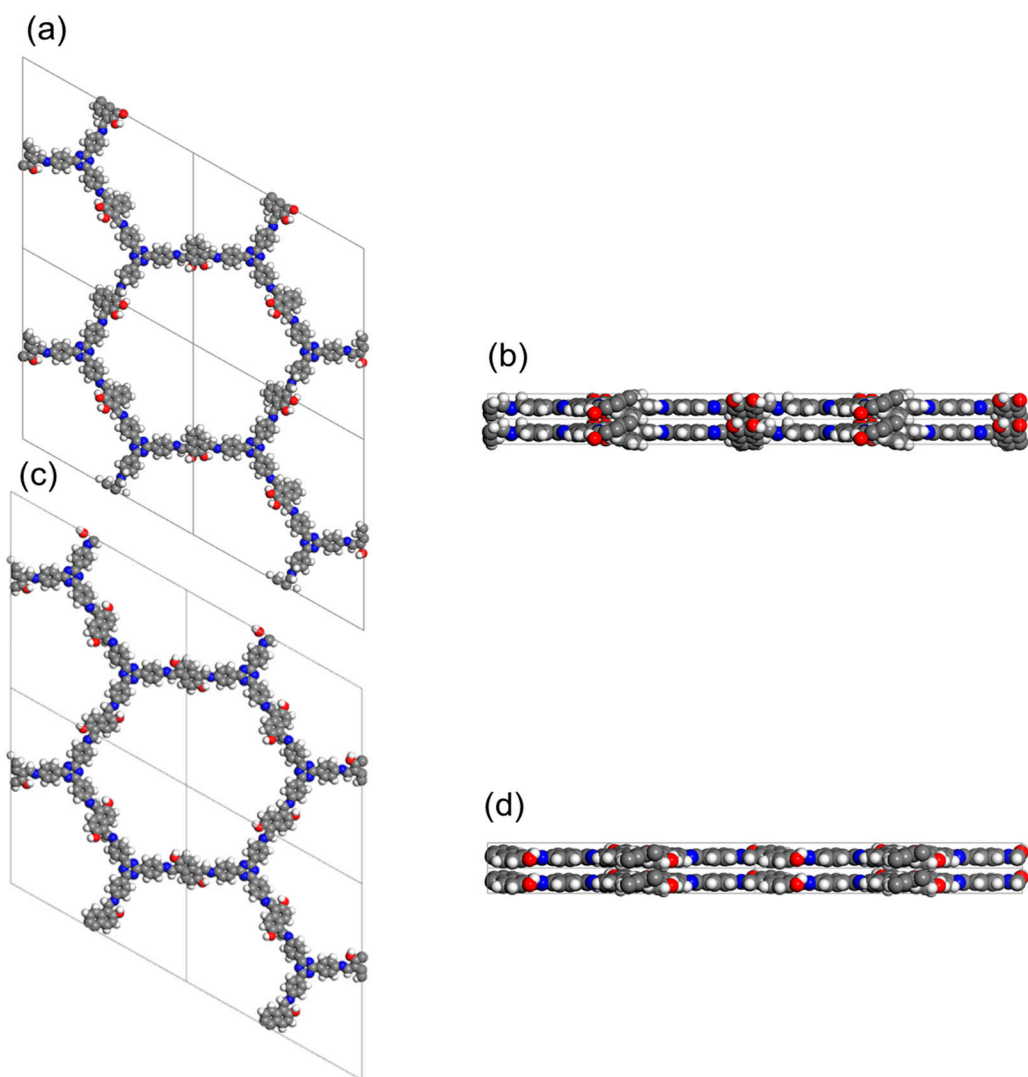

**Figure S12.** Crystalline structures for the TAPT-2,3-NA(OH)<sub>2</sub> and TAPT-2,6-NA(OH)<sub>2</sub> COFs with completely eclipsed AA-stacking models; 3D-view of the simulated structures of the COFs along (a, c) the c axis and (b, d) the a axis.

**Table S2.** Fractional atomic coordinates for the unit cell of TAPT-2,3-NA(OH)<sub>2</sub> COF with A–A stacking.

| Sample name: TAPT-2,3-NA(OH) <sub>2</sub> COF                                           |         |         |         |      |         |         |         |
|-----------------------------------------------------------------------------------------|---------|---------|---------|------|---------|---------|---------|
| Space group: P 1                                                                        |         |         |         |      |         |         |         |
| a = 43.4 Å, b = 43.2 Å, c = 3.649 Å, $\alpha = \beta = 90^\circ$ , $\gamma = 120^\circ$ |         |         |         |      |         |         |         |
| R <sub>wp</sub> = 7.45%, R <sub>p</sub> = 456%                                          |         |         |         |      |         |         |         |
| Atom                                                                                    | x/a     | y/b     | z/c     | Atom | x/a     | y/b     | z/c     |
| C1                                                                                      | 0.48504 | 0.95082 | 0.32530 | C73  | 0.55599 | 0.41496 | 0.50346 |
| C2                                                                                      | 0.49479 | 0.92419 | 0.44905 | C74  | 0.54037 | 0.44444 | 0.48084 |
| C3                                                                                      | 0.53090 | 0.94337 | 0.58646 | C75  | 0.55748 | 0.48121 | 0.35328 |
| C4                                                                                      | 0.43837 | 0.96020 | 0.06296 | C76  | 0.54025 | 0.50440 | 0.33938 |
| C5                                                                                      | 0.45080 | 0.93757 | 0.17442 | C77  | 0.50359 | 0.49392 | 0.45657 |
| C6                                                                                      | 0.46543 | 0.87897 | 0.47164 | C78  | 0.48668 | 0.45704 | 0.58504 |
| O7                                                                                      | 0.54357 | 0.92174 | 0.72926 | C79  | 0.50408 | 0.43402 | 0.59447 |
| N8                                                                                      | 0.46800 | 0.84796 | 0.45399 | C80  | 0.59279 | 0.49598 | 0.23317 |
| C9                                                                                      | 0.44291 | 0.80550 | 0.46279 | C81  | 0.61185 | 0.53087 | 0.10380 |

|     |         |         |         |      |          |          |          |
|-----|---------|---------|---------|------|----------|----------|----------|
| C10 | 0.40428 | 0.78395 | 0.47854 | C82  | 0.59619  | 0.55204  | 0.08311  |
| C11 | 0.38303 | 0.74365 | 0.47944 | C83  | 0.56117  | 0.53911  | 0.19486  |
| C12 | 0.39712 | 0.71907 | 0.46549 | C84  | 0.48765  | 0.52326  | 0.48068  |
| C13 | 0.43566 | 0.74114 | 0.45023 | O85  | 0.48478  | 0.39918  | 0.73529  |
| C14 | 0.45674 | 0.78105 | 0.44814 | O86  | 0.45202  | 0.44195  | 0.72583  |
| C15 | 0.37371 | 0.67318 | 0.46618 | N87  | 0.45415  | 0.52050  | 0.45495  |
| N16 | 0.33578 | 0.65279 | 0.46578 | N88  | 0.57783  | 0.08780  | 0.41797  |
| C17 | 0.31516 | 0.61472 | 0.46602 | C89  | 0.57051  | 0.05515  | 0.57732  |
| N18 | 0.33557 | 0.59716 | 0.46647 | C90  | 0.54464  | 0.01042  | 0.48246  |
| C19 | 0.37342 | 0.61441 | 0.46687 | C91  | 0.50840  | -0.00876 | 0.34450  |
| N20 | 0.39094 | 0.65243 | 0.46679 | C92  | 0.55441  | -0.01624 | 0.59907  |
| C21 | 0.39587 | 0.59103 | 0.46679 | C93  | 0.49406  | 0.01235  | 0.22716  |
| C22 | 0.26941 | 0.59149 | 0.46630 | C94  | 0.45957  | -0.00295 | 0.09142  |
| C23 | 0.24514 | 0.60589 | 0.44716 | O95  | 0.58876  | -0.00312 | 0.74222  |
| C24 | 0.20499 | 0.58481 | 0.44768 | C96  | -3.41184 | 0.15701  | 1.50413  |
| C25 | 0.18322 | 0.54603 | 0.46854 | H97  | 0.41194  | 0.94892  | -0.05266 |
| C26 | 0.20737 | 0.53190 | 0.48850 | H98  | 0.43316  | 0.90936  | 0.13158  |
| C27 | 0.24713 | 0.55282 | 0.48645 | H99  | 0.43845  | 0.87340  | 0.50637  |
| C28 | 0.37957 | 0.55236 | 0.44476 | H100 | 0.56848  | 0.93603  | 0.83443  |
| C29 | 0.39846 | 0.53140 | 0.44268 | H101 | 0.38972  | 0.79819  | 0.48959  |
| C30 | 0.43665 | 0.54546 | 0.46468 | H102 | 0.35439  | 0.73147  | 0.49194  |
| C31 | 0.45354 | 0.58423 | 0.48750 | H103 | 0.45048  | 0.72713  | 0.43802  |
| C32 | 0.43444 | 0.60535 | 0.48788 | H104 | 0.48539  | 0.79336  | 0.43397  |
| N33 | 0.14085 | 0.52110 | 0.47781 | H105 | 0.25747  | 0.63467  | 0.43049  |
| C34 | 0.11010 | 0.52389 | 0.45467 | H106 | 0.19102  | 0.59962  | 0.43228  |
| C35 | 0.06496 | 0.49447 | 0.47794 | H107 | 0.19498  | 0.50314  | 0.50705  |
| C36 | 0.03856 | 0.50468 | 0.59629 | H108 | 0.26087  | 0.53774  | 0.50302  |
| C37 | 0.04529 | 0.45764 | 0.34889 | H109 | 0.35084  | 0.53735  | 0.42652  |
| C38 | 0.05203 | 0.53936 | 0.74091 | H110 | 0.38219  | 0.50265  | 0.42240  |
| C39 | 0.02977 | 0.55219 | 0.85156 | H111 | 0.48225  | 0.59899  | 0.50451  |
| O40 | 0.06496 | 0.44278 | 0.20491 | H112 | 0.45079  | 0.63413  | 0.50611  |
| C41 | 0.99821 | 0.48132 | 0.58197 | H113 | 0.11581  | 0.55098  | 0.41255  |
| C42 | 0.97875 | 0.44445 | 0.45567 | H114 | 0.08015  | 0.55706  | 0.78039  |
| C43 | 1.00519 | 0.43425 | 0.34620 | H115 | 0.04124  | 0.57895  | 0.96229  |
| C44 | 0.99306 | 0.53095 | 0.82932 | H116 | 0.09164  | 0.45877  | 0.22410  |
| C45 | 0.97752 | 0.49606 | 0.70008 | H117 | 0.97634  | 0.54144  | 0.92068  |
| C46 | 0.93357 | 0.41564 | 0.41805 | H118 | 0.94878  | 0.48039  | 0.69545  |
| O47 | 0.99180 | 0.39934 | 0.21712 | H119 | 0.92795  | 0.39057  | 0.29637  |
| N48 | 0.90273 | 0.41710 | 0.49884 | H120 | 0.97330  | 0.38109  | 0.38866  |
| C49 | 0.86038 | 0.39243 | 0.47701 | H121 | 0.84844  | 0.43407  | 0.60775  |
| C50 | 0.83616 | 0.40589 | 0.54521 | H122 | 0.78261  | 0.39955  | 0.59500  |
| C51 | 0.79640 | 0.38502 | 0.53810 | H123 | 0.78626  | 0.30487  | 0.34396  |
| C52 | 0.77419 | 0.34693 | 0.46799 | H124 | 0.85273  | 0.34001  | 0.34885  |
| C53 | 0.79854 | 0.33315 | 0.40212 | H125 | 0.60350  | 0.12700  | 0.85228  |
| C54 | 0.83868 | 0.35428 | 0.40402 | H126 | 0.65733  | 0.13925  | 0.38660  |
| C55 | 0.72846 | 0.32355 | 0.46647 | H127 | 0.69095  | 0.20460  | 0.35776  |
| N56 | 0.70776 | 0.34078 | 0.46986 | H128 | 0.69186  | 0.39968  | 0.38442  |
| C57 | 0.66987 | 0.32320 | 0.47168 | H129 | 0.66051  | 0.43430  | 0.37574  |
| N58 | 0.65257 | 0.28512 | 0.47283 | H130 | 0.56127  | 0.33892  | 0.55154  |
| C59 | 0.67022 | 0.26477 | 0.46814 | H131 | 0.59275  | 0.30373  | 0.55488  |
| N60 | 0.70810 | 0.28554 | 0.46365 | H132 | 0.53471  | 0.38874  | 0.58259  |

|     |         |         |         |      |          |         |          |
|-----|---------|---------|---------|------|----------|---------|----------|
| C61 | 0.64727 | 0.34643 | 0.47065 | H133 | 0.60600  | 0.48036 | 0.23727  |
| C62 | 0.64832 | 0.21898 | 0.46823 | H134 | 0.63900  | 0.54142 | 0.01135  |
| C63 | 0.61357 | 0.19307 | 0.49499 | H135 | 0.61128  | 0.57882 | -0.02757 |
| C6  | 0.60194 | 0.12909 | 0.55404 | H136 | 0.55057  | 0.55673 | 0.15590  |
| C65 | 0.64290 | 0.15332 | 0.43372 | H137 | 0.50886  | 0.55030 | 0.52633  |
| C66 | 0.66286 | 0.19219 | 0.42051 | H138 | 0.45998  | 0.39270 | 0.82087  |
| C67 | 0.66332 | 0.38486 | 0.42295 | H139 | 0.44120  | 0.45794 | 0.70598  |
| C68 | 0.64441 | 0.40579 | 0.41802 | H140 | 0.58522  | 0.05832 | 0.82651  |
| C69 | 0.60645 | 0.39197 | 0.46416 | H141 | 0.50980  | 0.04124 | 0.23749  |
| C70 | 0.58979 | 0.35345 | 0.51391 | H142 | 0.44937  | 0.01405 | 0.00010  |
| C71 | 0.60889 | 0.33231 | 0.51530 | H143 | 0.60672  | 0.02160 | 0.65143  |
| N72 | 0.58894 | 0.41690 | 0.45041 | H144 | -3.43972 | 0.14858 | 1.54072  |

**Table S3.** Fractional atomic coordinates for the unit cell of TAPT-2,6-NA(OH)<sub>2</sub> COF with A–A stacking.

| Sample name: TAPT-2,6-NA(OH) <sub>2</sub> COF                                         |          |         |         |      |          |         |         |
|---------------------------------------------------------------------------------------|----------|---------|---------|------|----------|---------|---------|
| Space group: P 1                                                                      |          |         |         |      |          |         |         |
| a = 42.3 Å, b = 42.1 Å, c = 3.5 Å, $\alpha = \beta = 90^\circ$ , $\gamma = 120^\circ$ |          |         |         |      |          |         |         |
| R <sub>wp</sub> = 6.84%, R <sub>p</sub> = 3.66%                                       |          |         |         |      |          |         |         |
| Atom                                                                                  | x/a      | y/b     | z/c     | Atom | x/a      | y/b     | z/c     |
| C1                                                                                    | 0.51283  | 1.05796 | 0.41180 | N73  | 0.57952  | 0.52033 | 0.51742 |
| C2                                                                                    | 0.54531  | 1.05890 | 0.31681 | C74  | 0.55051  | 0.51915 | 0.33988 |
| C3                                                                                    | 0.57823  | 1.09220 | 0.28517 | C75  | 0.52573  | 0.53685 | 0.45991 |
| C4                                                                                    | 0.44732  | 1.02539 | 0.55203 | C76  | 0.53081  | 0.57417 | 0.39829 |
| C5                                                                                    | 0.47796  | 1.02187 | 0.45825 | C77  | 0.50080  | 0.58316 | 0.43884 |
| C6                                                                                    | 0.47203  | 0.98085 | 0.42146 | C78  | 0.46672  | 0.55418 | 0.53871 |
| O7                                                                                    | 0.41336  | 0.99401 | 0.60989 | C79  | 0.46178  | 0.51918 | 0.61103 |
| N8                                                                                    | 0.43964  | 0.94908 | 0.45601 | C80  | 0.48999  | 0.51057 | 0.57306 |
| C9                                                                                    | 0.42433  | 0.90765 | 0.44241 | C81  | 0.56498  | 0.60286 | 0.29795 |
| C10                                                                                   | 0.38592  | 0.88345 | 0.47343 | C82  | 0.57102  | 0.63853 | 0.26387 |
| C11                                                                                   | 0.36833  | 0.84377 | 0.46916 | C83  | 0.54361  | 0.64767 | 0.31521 |
| C12                                                                                   | 0.38751  | 0.82399 | 0.43601 | C84  | 0.50635  | 0.62086 | 0.38073 |
| C13                                                                                   | 0.42642  | 0.84827 | 0.40562 | C85  | 0.47898  | 0.63682 | 0.30746 |
| C14                                                                                   | 0.44419  | 0.88848 | 0.40777 | O86  | 0.48239  | 0.47476 | 0.64526 |
| C15                                                                                   | 0.36668  | 0.77953 | 0.43490 | O87  | 0.55518  | 0.68506 | 0.29485 |
| N16                                                                                   | 0.32858  | 0.75886 | 0.44049 | N88  | 0.44978  | 0.63373 | 0.49677 |
| C17                                                                                   | 0.30907  | 0.72064 | 0.44114 | N89  | 0.58825  | 0.20358 | 0.40543 |
| N18                                                                                   | 0.32965  | 0.70310 | 0.44033 | C90  | 0.55627  | 0.17165 | 0.45533 |
| C19                                                                                   | 0.36773  | 0.72163 | 0.43517 | C91  | 0.55064  | 0.13065 | 0.42278 |
| N20                                                                                   | 0.38539  | 0.75996 | 0.43044 | C92  | 0.51556  | 0.09452 | 0.45992 |
| C21                                                                                   | 0.38981  | 0.69930 | 0.43845 | C93  | 0.58155  | 0.12668 | 0.34868 |
| C22                                                                                   | 0.26484  | 0.69746 | 0.43992 | C94  | 0.48289  | 0.09347 | 0.54808 |
| C23                                                                                   | 0.37317  | 0.66127 | 0.53734 | C95  | 0.45016  | 0.06013 | 0.59287 |
| C24                                                                                   | 0.39255  | 0.64082 | 0.54995 | O96  | 0.61708  | 0.15635 | 0.34545 |
| C25                                                                                   | 0.43015  | 0.65584 | 0.45232 | H97  | 0.54582  | 1.03383 | 0.26864 |
| C26                                                                                   | 0.44709  | 0.69381 | 0.34947 | H98  | 0.60292  | 1.09159 | 0.22006 |
| C27                                                                                   | 0.42784  | 0.71464 | 0.34595 | H99  | 0.49587  | 0.97854 | 0.36464 |
| C28                                                                                   | 0.24108  | 0.71267 | 0.47956 | H100 | 0.39398  | 0.99896 | 0.71536 |
| C29                                                                                   | 0.20104  | 0.69077 | 0.47726 | H101 | 0.36899  | 0.89588 | 0.50264 |
| C30                                                                                   | 0.18154  | 0.65179 | 0.43154 | H102 | 0.33890  | 0.82821 | 0.49494 |
| C31                                                                                   | 0.20522  | 0.63699 | 0.39074 | H103 | 0.44351  | 0.83600 | 0.37871 |
| C32                                                                                   | 0.24476  | 0.65854 | 0.39644 | H104 | 0.47357  | 0.90442 | 0.38351 |
| N33                                                                                   | 0.14019  | 0.62620 | 0.41884 | H105 | 0.34460  | 0.64707 | 0.61590 |
| C34                                                                                   | 0.10880  | 0.62719 | 0.46676 | H106 | 0.37775  | 0.61248 | 0.64005 |
| C35                                                                                   | 0.06766  | 0.59241 | 0.43540 | H107 | 0.47580  | 0.70794 | 0.27785 |
| C36                                                                                   | 0.03214  | 0.59244 | 0.47058 | H108 | 0.44305  | 0.74330 | 0.26640 |
| C37                                                                                   | -0.00462 | 0.55909 | 0.42348 | H109 | 0.25364  | 0.74205 | 0.51494 |
| C38                                                                                   | -0.00448 | 0.52695 | 0.33130 | H110 | 0.18547  | 0.70458 | 0.51017 |
| C39                                                                                   | 0.02825  | 0.52632 | 0.30164 | H111 | 0.19257  | 0.60763 | 0.35294 |
| C40                                                                                   | 0.06290  | 0.55702 | 0.36445 | H112 | 0.25994  | 0.64429 | 0.36274 |
| C41                                                                                   | 0.03189  | 0.62467 | 0.55586 | H113 | 0.11152  | 0.65344 | 0.53453 |
| O42                                                                                   | 0.09190  | 0.55014 | 0.36390 | H114 | -0.02975 | 0.50164 | 0.28401 |
| C43                                                                                   | 0.99911  | 0.62507 | 0.59887 | H115 | 0.02702  | 0.50057 | 0.23889 |
| C44                                                                                   | 0.96418  | 0.59362 | 0.55903 | H116 | 0.05718  | 0.65015 | 0.59548 |

|     |         |         |         |      |         |         |         |
|-----|---------|---------|---------|------|---------|---------|---------|
| C45 | 0.95989 | 0.55894 | 0.46815 | H117 | 0.10955 | 0.56318 | 0.58110 |
| C46 | 0.91874 | 0.52447 | 0.43195 | H118 | 1.00092 | 0.65094 | 0.66832 |
| O47 | 0.93339 | 0.59719 | 0.61487 | H119 | 0.91583 | 0.49793 | 0.37621 |
| N48 | 0.88754 | 0.52603 | 0.46582 | H120 | 0.93888 | 0.62196 | 0.71530 |
| C49 | 0.84620 | 0.50057 | 0.45209 | H121 | 0.83542 | 0.54501 | 0.51433 |
| C50 | 0.82262 | 0.51556 | 0.48399 | H122 | 0.76795 | 0.50847 | 0.50558 |
| C51 | 0.78306 | 0.49408 | 0.47914 | H123 | 0.77393 | 0.41023 | 0.38454 |
| C52 | 0.76289 | 0.45507 | 0.44427 | H124 | 0.84207 | 0.44750 | 0.39065 |
| C53 | 0.78656 | 0.43969 | 0.41294 | H125 | 0.58434 | 0.31653 | 0.50921 |
| C54 | 0.82660 | 0.46148 | 0.41583 | H126 | 0.55441 | 0.24809 | 0.50354 |
| C55 | 0.71865 | 0.43195 | 0.44141 | H127 | 0.65865 | 0.25702 | 0.33304 |
| N56 | 0.69812 | 0.44954 | 0.44826 | H128 | 0.68859 | 0.32459 | 0.34364 |
| C57 | 0.66004 | 0.43107 | 0.44315 | H129 | 0.68374 | 0.50560 | 0.62355 |
| N58 | 0.64231 | 0.39274 | 0.43544 | H130 | 0.65118 | 0.54068 | 0.65087 |
| C59 | 0.66099 | 0.37312 | 0.43208 | H131 | 0.55231 | 0.44583 | 0.29538 |
| N60 | 0.69910 | 0.39376 | 0.43303 | H132 | 0.58457 | 0.40986 | 0.27977 |
| C61 | 0.64014 | 0.32867 | 0.42706 | H133 | 0.53706 | 0.49773 | 0.12807 |
| C62 | 0.63811 | 0.45356 | 0.44886 | H134 | 0.44388 | 0.55885 | 0.57298 |
| C63 | 0.60136 | 0.30433 | 0.47016 | H135 | 0.43492 | 0.49778 | 0.69658 |
| C64 | 0.58367 | 0.26411 | 0.46755 | H136 | 0.58761 | 0.59795 | 0.25833 |
| C65 | 0.60346 | 0.24503 | 0.41817 | H137 | 0.59826 | 0.66063 | 0.20079 |
| C66 | 0.64173 | 0.26930 | 0.37375 | H138 | 0.48947 | 0.65791 | 0.09095 |
| C67 | 0.65926 | 0.30897 | 0.37975 | H139 | 0.45694 | 0.45795 | 0.74809 |
| C68 | 0.65512 | 0.49161 | 0.54685 | H140 | 0.54083 | 0.69266 | 0.46670 |
| C69 | 0.63609 | 0.51235 | 0.56098 | H141 | 0.53256 | 0.17378 | 0.52579 |
| C70 | 0.59848 | 0.49769 | 0.46603 | H142 | 0.48222 | 0.11856 | 0.58863 |
| C71 | 0.58109 | 0.45969 | 0.36397 | H143 | 0.42591 | 0.06132 | 0.66455 |
| C72 | 0.60005 | 0.43853 | 0.35855 | H144 | 0.62157 | 0.17387 | 0.56432 |

## S8. FTIR Spectral Profiles of Monomers and COFs

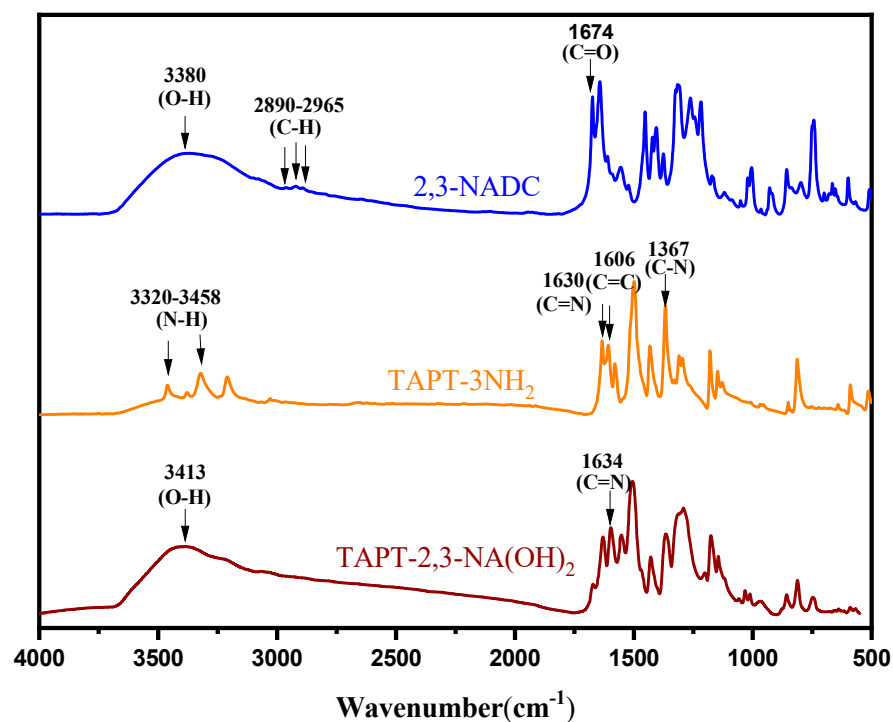

Figure S13. FTIR spectrum of 2,3-NADC, TAPT-3NH<sub>2</sub>, and TAPT-2,3-NA(OH)<sub>2</sub> COFs.



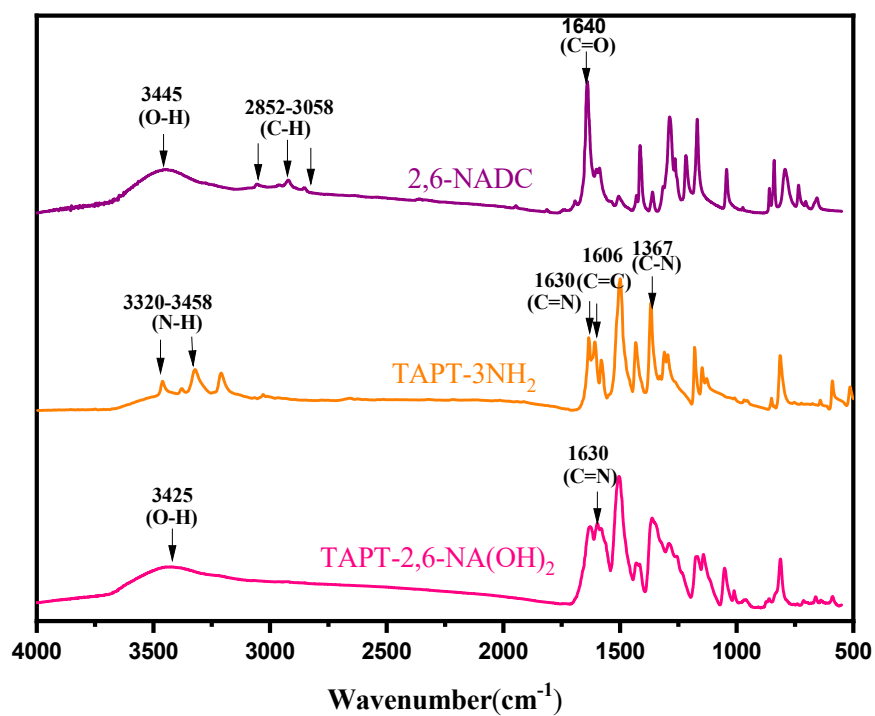

Figure S14. FTIR spectrum of 2,6-NADC, TAPT-3NH<sub>2</sub>, and TAPT-2,6-NA(OH)<sub>2</sub> COFs.

#### S9. X-Ray Photoelectron Spectroscopy Analysis

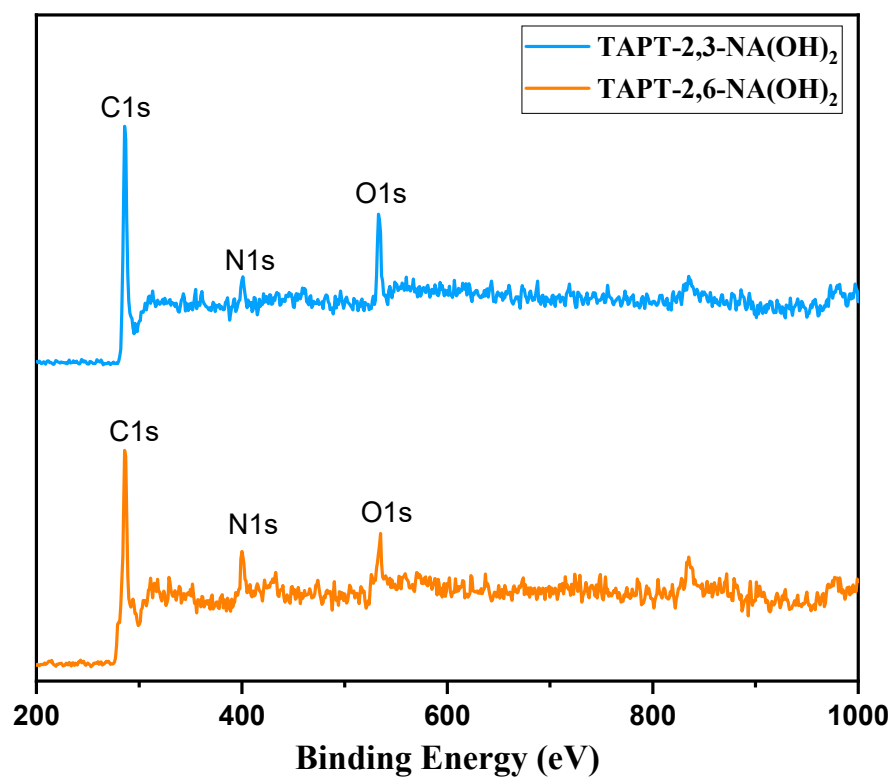

Figure S15. XPS spectra of TAPT-2,3-NA(OH)<sub>2</sub> and TAPT-2,6-NA(OH)<sub>2</sub> COFs.

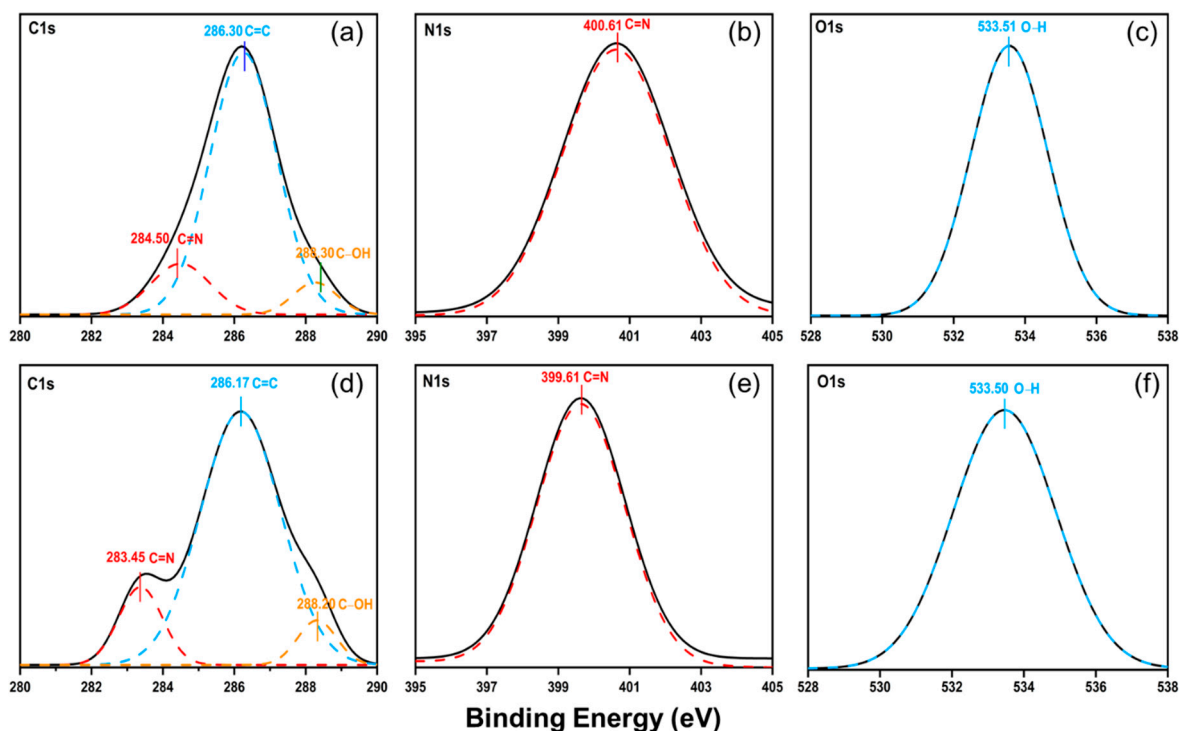

**Figure S16.** XPS spectra of the (a,d) C1s, (b,e) N1s and (c,f) O1s peaks for (a–c) TAPT-2,3-NA(OH)<sub>2</sub> and (d–f) TAPT-2,6-NA(OH)<sub>2</sub> COFs.

**Table S4.** XPS fitting positions of TAPT-2,3-NA(OH)<sub>2</sub> and TAPT-2,6-NA(OH)<sub>2</sub> COF.

|      | Sample                       | C species |        |        | N species | O species |
|------|------------------------------|-----------|--------|--------|-----------|-----------|
|      |                              | C=N       | C=C    | C–OH   | =N–       | –O–H      |
| COFs | TAPT-2,3-NA(OH) <sub>2</sub> | 284.60    | 286.30 | 288.30 | 400.61    | 533.51    |
|      | TAPT-2,6-NA(OH) <sub>2</sub> | 283.45    | 286.17 | 288.20 | 399.61    | 533.50    |

**Table S5.** XPS fitting ratio of TAPT-2,3-NA(OH)<sub>2</sub> and TAPT-2,6-NA(OH)<sub>2</sub> COF.

|      | Sample                       | C species |       |      | N species | O species |
|------|------------------------------|-----------|-------|------|-----------|-----------|
|      |                              | C=N       | C=C   | C–OH | =N–       | –O–H      |
| COFs | TAPT-2,3-NA(OH) <sub>2</sub> | 13.78     | 79.82 | 6.40 | 100       | 100       |
|      | TAPT-2,6-NA(OH) <sub>2</sub> | 13.37     | 79.82 | 6.81 | 100       | 100       |

## S10. Transmission Electron Microscopy (TEM)

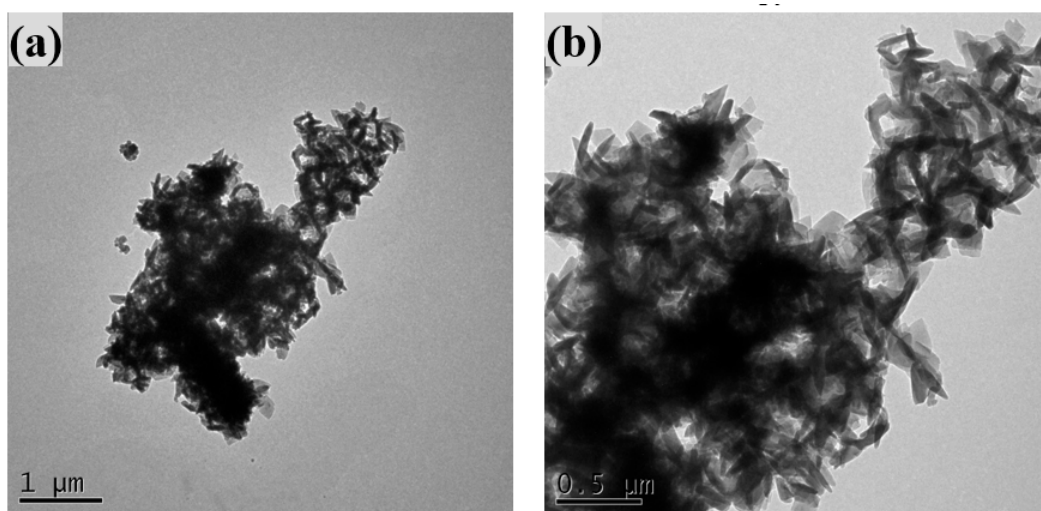

**Figure S17.** TEM images of the TAPT-2,3-NA(OH)<sub>2</sub> COF recorded at various magnifications: (a) 1  $\mu\text{m}$ , (b) 0.5  $\mu\text{m}$ .

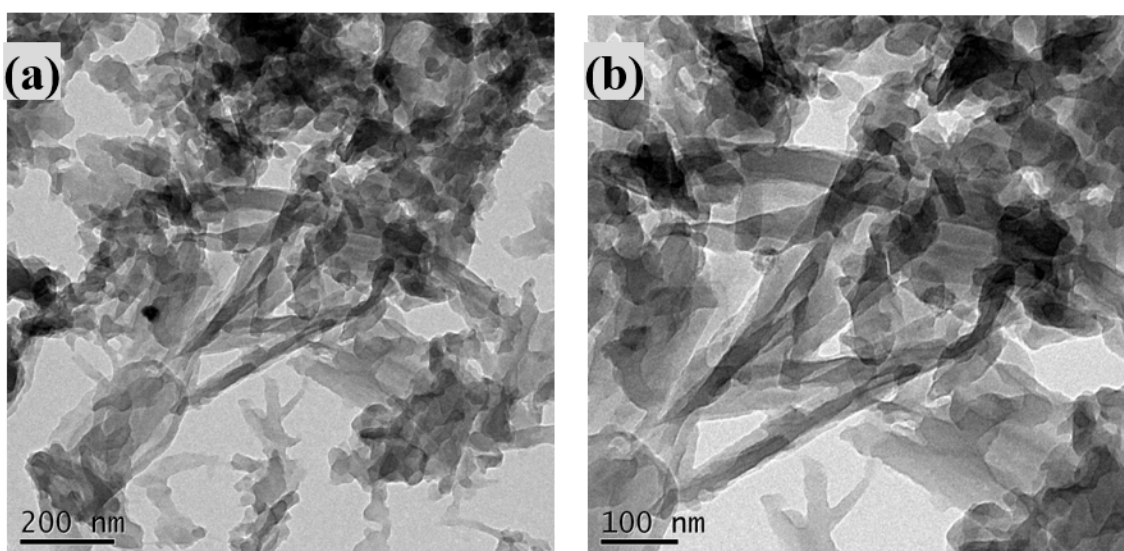

**Figure S18.** TEM images of the TAPT-2,6-NA(OH)<sub>2</sub> COF recorded at various magnifications: (a) 200 nm, (b) 100 nm.

## S11. Field Emission Scanning Electron Microscopy (FE-SEM)

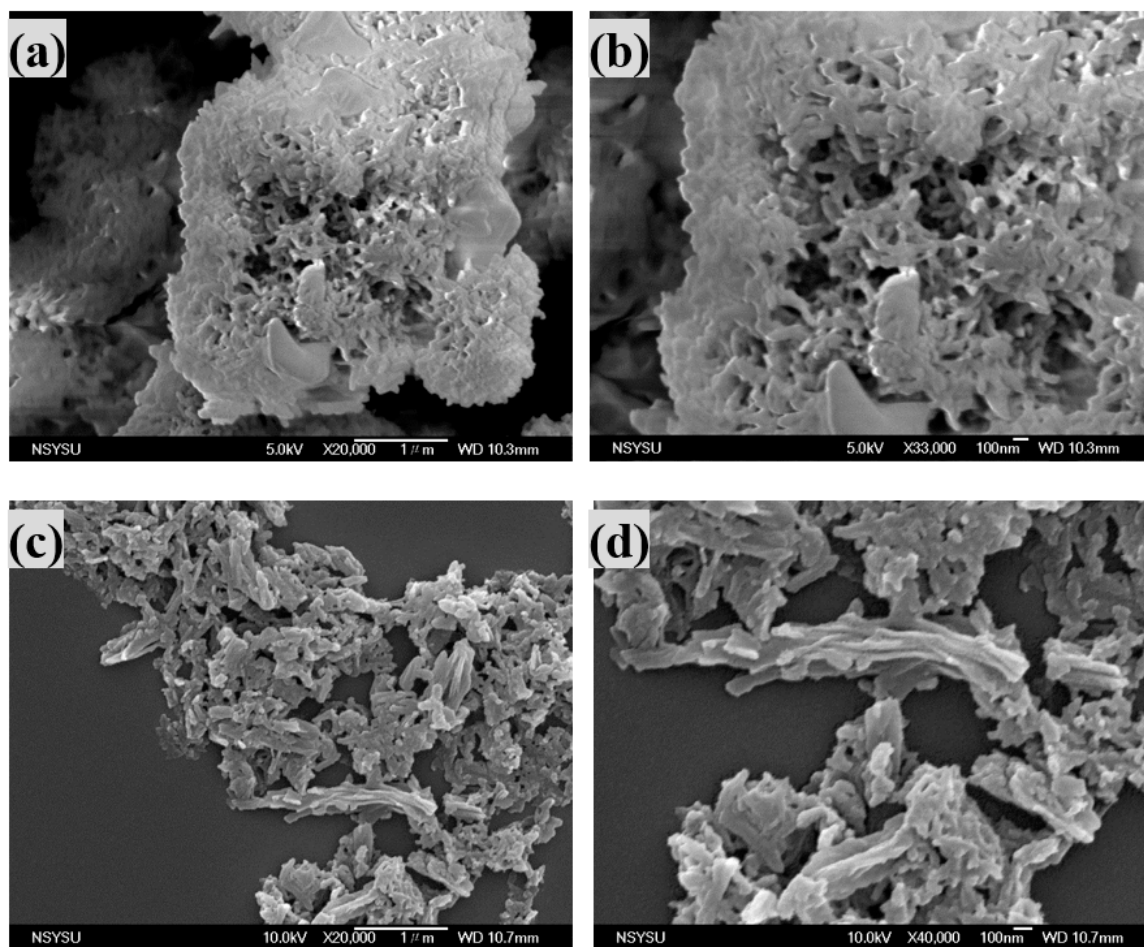

**Figure S19.** FE-SEM images of the (a, b) TAPT-2,3-NA(OH)<sub>2</sub> COF, (c, d) TAPT-2,6-NA(OH)<sub>2</sub> COF, recorded at various magnifications: (a, c) 1 μm and (b, d) 100 nm.

## S12. Thermal Gravimetric Analysis

**Table S6.** Values of  $T_{d10\%}$ , and Char yield of TAPT-2,3-NA(OH)<sub>2</sub> and TAPT-2,6-NA(OH)<sub>2</sub> COFs.

| COF                          | $T_{d10\%}$ (°C) | Char yield (wt%) |
|------------------------------|------------------|------------------|
| TAPT-2,3-NA(OH) <sub>2</sub> | 435              | 60.44            |
| TAPT-2,6-NA(OH) <sub>2</sub> | 460              | 60.07            |

### S13. Electrochemical analysis

**Working electrode cleaning:** Prior to use, the glassy carbon electrode (GCE) was polished several times with 0.05- $\mu\text{m}$  alumina powder, washed with EtOH after each polishing step, cleaned via sonication (5 min) in a water bath, washed with EtOH, and then dried in air.

**Electrochemical Characterization:** The electrochemical experiments were measured in a three-electrode cell using an Autolab potentiostat (PGSTAT204) in aqueous electrolyte 1 M KOH. The GCE was used as the working electrode (diameter: 5.61 mm; 0.2475  $\text{cm}^2$ ). A platinum wire was used as the counter electrode; Hg/HgO (RE-61AP, BAS) was used as the reference electrode. All reported potentials refer to the Hg/HgO potential. The GCE was modified with COF slurries as described elsewhere with some modifications.<sup>S1-S3</sup> The slurries were prepared by dispersing COF (45 wt. %), carbon black (45 wt. %), and Nafion (10 wt. %) in 2 mL of ethanol and sonicated for one hour. A portion of this slurry (10  $\mu\text{L}$ ) was pipetted onto the tip of the electrode which was then dried in air for 30 minutes before use. The electrochemical performance was studied using cyclic voltammetry (CV) at different sweep rates from 5 to 200  $\text{mV s}^{-1}$ , galvanostatic charge–discharge (GCD) in the potential range from 0.18 to  $-0.92$  V vs. Hg/HgO at different current densities from 2 to 20  $\text{A g}^{-1}$  in a 1 M KOH aqueous electrolyte solution.

The specific capacitance was calculated from galvanostatic charge–discharge experiments using the following equation:<sup>S3,S4</sup>

$$C_s = (I\Delta t)/(m\Delta V) \quad (\text{S1})$$

Where  $C_s$  (F/g) is specific capacitance of the supercapacitor,  $I$  (A) is the discharge current,  $\Delta V$  (V) is the potential window,  $\Delta t$  (s) is the discharge time, and  $m$  (g) is the mass of COF on the electrode.

The energy density ( $E$ , Wh/kg), and the power density ( $P$ , W/kg) were calculated using

the following equations:

$$E = 1000C(\Delta V)^2/(2 \times 3600) \quad (\text{S2})$$

$$P = E/(t/3600) \quad (\text{S3})$$

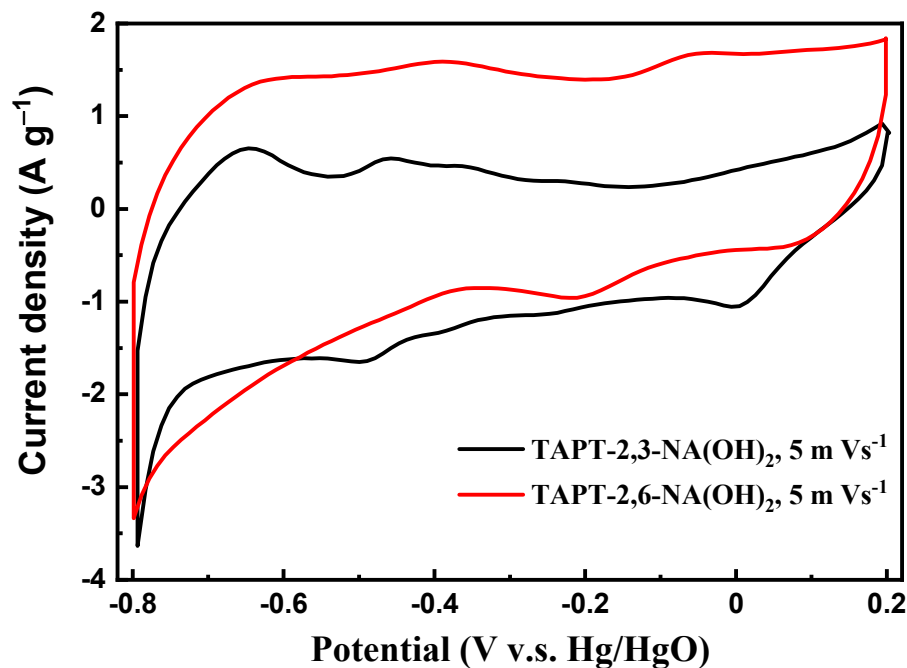

**Figure S20.** Comparison CV curves of the TAPT-2,3-NA(OH)<sub>2</sub> and TAPT-2,6-NA(OH)<sub>2</sub> COFs, measured at a scan rate (5  $\text{mV s}^{-1}$ ).

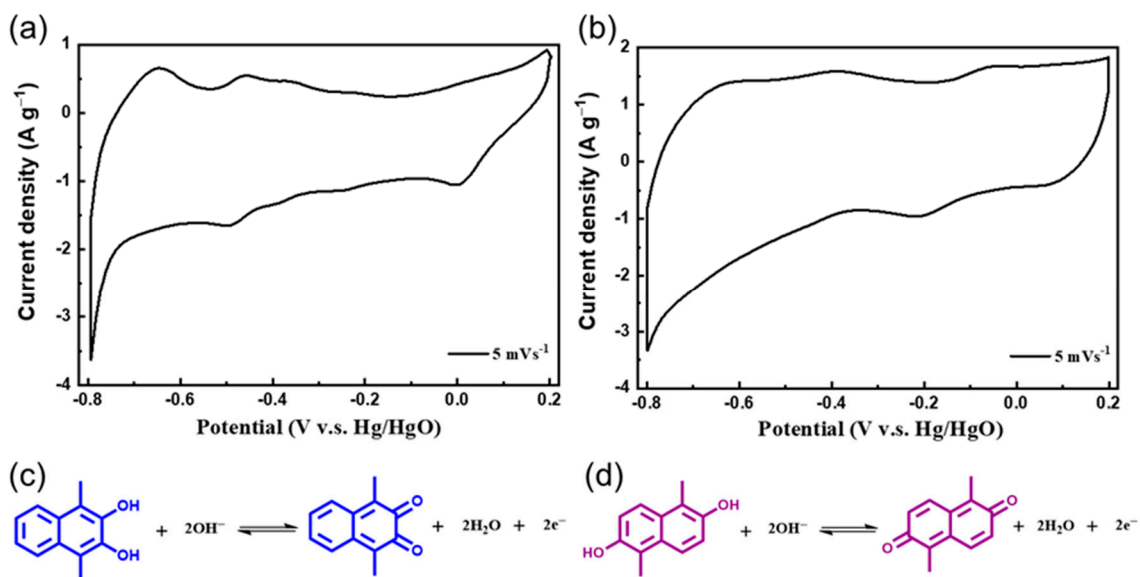

**Figure S21.** CV curves of the (a) TAPT-2,3-NA(OH)<sub>2</sub> and (b) TAPT-2,6-NA(OH)<sub>2</sub> COFs, measured at a scan rate (5 mV s<sup>-1</sup>). Redox transformation of the (c) TAPT-2,3-NA(OH)<sub>2</sub> COF, (d) TAPT-2,6-NA(OH)<sub>2</sub> COF.

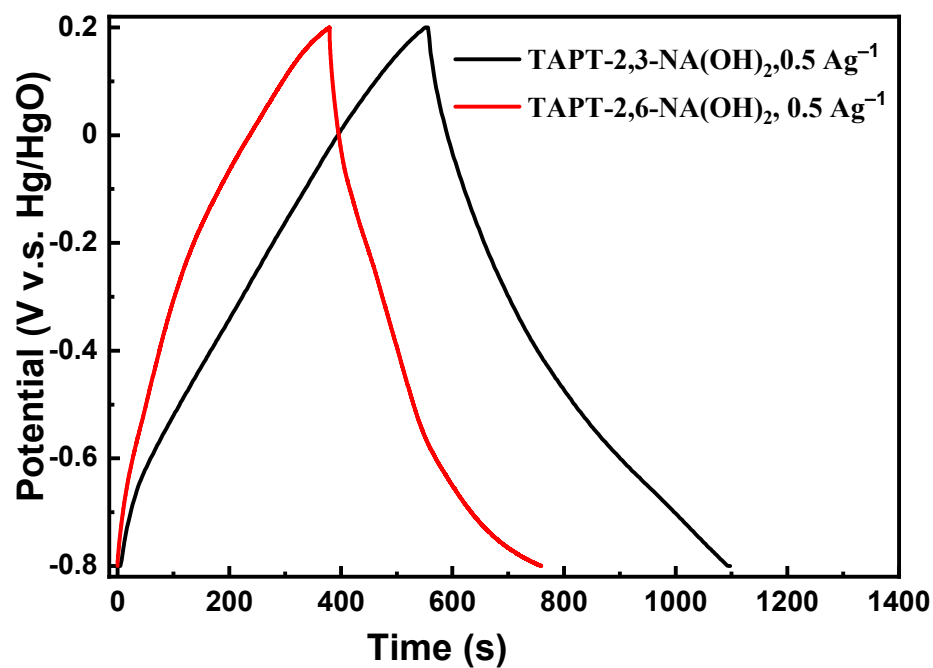

**Figure S22.** GCD curve of TAPT-2,3-NA(OH)<sub>2</sub> and TAPT-2,6-NA(OH)<sub>2</sub> COFs, measured at a current density (0.5 A g<sup>-1</sup>).

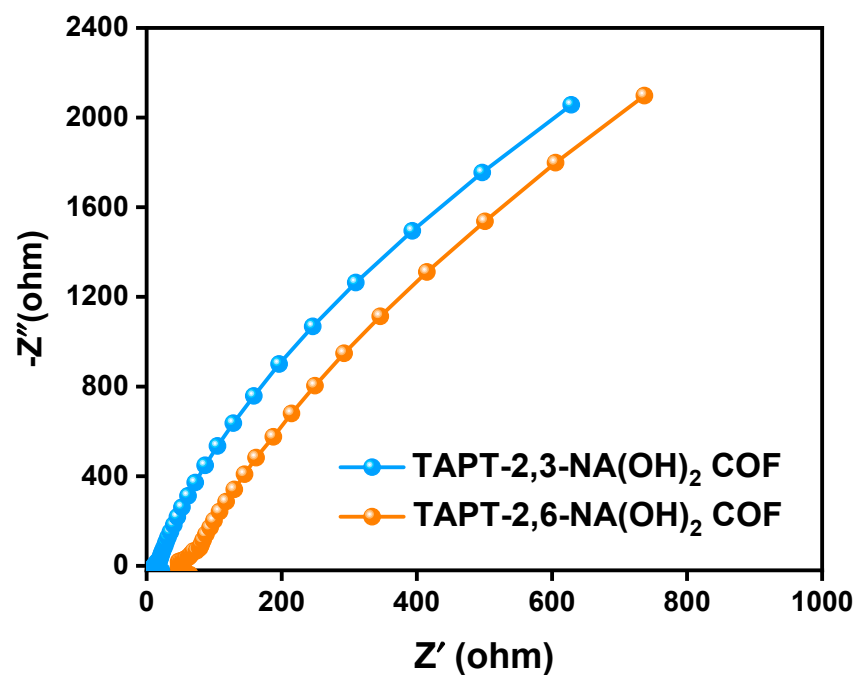

**Figure S23.** Electrochemical impedance spectroscopy (Nyquist plots) of TAPT-2,3-NA(OH)<sub>2</sub> and TAPT-2,6-NA(OH)<sub>2</sub> COFs.

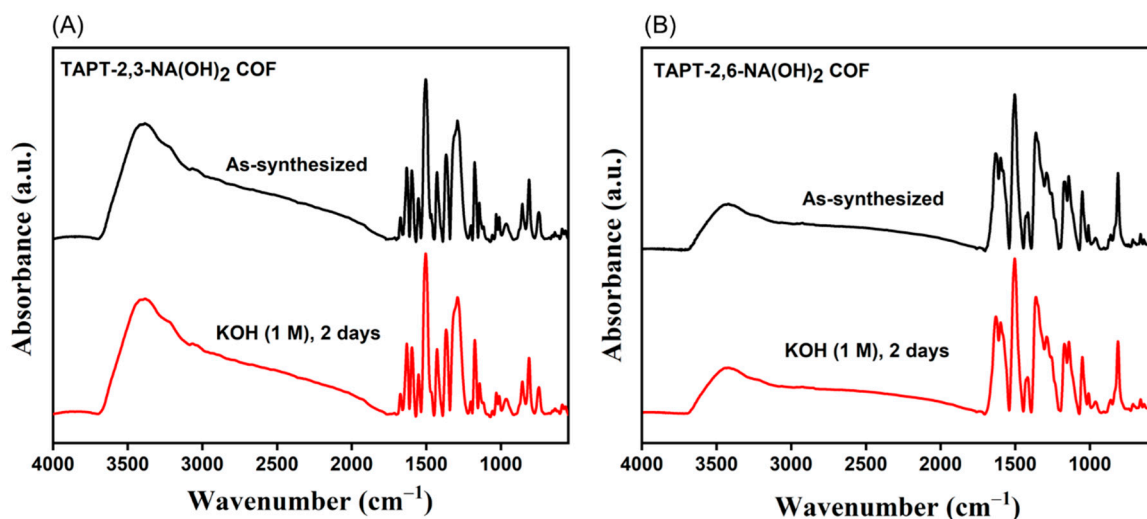

**Figure S24.** FTIR spectra of TAPT-2,3-NA(OH)<sub>2</sub> and TAPT-2,6-NA(OH)<sub>2</sub> COFs as-synthesized and after soaking 2 days in KOH (1 M).

#### S14. Comparison Study

**Table S7.** Comparison between the specific surface area/specific capacitance of TAPT-2,3-NA(OH)<sub>2</sub> and (b) TAPT-2,3-NA(OH)<sub>2</sub> COFs with those of previously reported COFs for supercapacitor application.

| COFs         | S <sub>BET</sub><br>(m <sup>2</sup> g <sup>-1</sup> ) | Capacitance                                        | Ref. |
|--------------|-------------------------------------------------------|----------------------------------------------------|------|
| TPT-DAHQ     | 1855                                                  | 256 F g <sup>-1</sup> at 0.5 A g <sup>-1</sup>     | S1   |
| Car-TPA COF  | 1334                                                  | 13.6 F g <sup>-1</sup> at 0.2 A g <sup>-1</sup>    | S2   |
| Car-TPP COF  | 743                                                   | 14.5 F g <sup>-1</sup> at 0.2 A g <sup>-1</sup>    | S2   |
| Car-TPT COF  | 721                                                   | 17.4 F g <sup>-1</sup> at 0.2 A g <sup>-1</sup>    | S2   |
| DAAQ-TFP COF | 1280                                                  | 48 ± 10 F g <sup>-1</sup> at 0.1 A g <sup>-1</sup> | S3   |
| TPA-COF-1    | 714                                                   | 51.3 F g <sup>-1</sup> at 0.2 A g <sup>-1</sup>    | S5   |

|                              |      |                                                 |           |
|------------------------------|------|-------------------------------------------------|-----------|
| TPA-COF-2                    | 478  | 14.4 F g <sup>-1</sup> at 0.2 A g <sup>-1</sup> | S5        |
| TPA-COF-3                    | 557  | 5.1 F g <sup>-1</sup> at 0.2 A g <sup>-1</sup>  | S5        |
| TPT-COF-4                    | 1132 | 2.4 F g <sup>-1</sup> at 0.2 A g <sup>-1</sup>  | S5        |
| TPT-COF-5                    | 1747 | 0.34 F g <sup>-1</sup> at 0.2 A g <sup>-1</sup> | S5        |
| TPT-COF-6                    | 1535 | 0.24 F g <sup>-1</sup> at 0.2 A g <sup>-1</sup> | S5        |
| TaPay-Py COF                 | 687  | 209 F g <sup>-1</sup> at 0.5 A g <sup>-1</sup>  | S6        |
| DAB-TFP COF                  | 385  | 98 F g <sup>-1</sup> at 0.5 A g <sup>-1</sup>   | S6        |
| TFP-TPA COF                  | 457  | 291.1 F g <sup>-1</sup> at 2 A g <sup>-1</sup>  | S7        |
| TFP-TPP COF                  | 686  | 185.5 F g <sup>-1</sup> at 2 A g <sup>-1</sup>  | S7        |
| TFP-Car COF                  | 362  | 149.3 F g <sup>-1</sup> at 2 A g <sup>-1</sup>  | S7        |
| TAPT-2,3-NA(OH) <sub>2</sub> | 429  | 271 F g <sup>-1</sup> at 0.5 A g <sup>-1</sup>  | This work |
| TAPT-2,6-NA(OH) <sub>2</sub> | 1089 | 190 F g <sup>-1</sup> at 0.5 A g <sup>-1</sup>  | This work |

### S15. References

- S1. El-Mahdy, A. F. M.; Hung, Y. H.; Mansoure, T. H.; Yu, H. H.; Chen, T.; Kuo, S. W. A hollow microtubular triazine- and benzobisoxazole-based covalent organic framework presenting sponge-like shells that functions as a high-performance supercapacitor. *Chem. Asian J.* **2019**, *14*, 1429–1435.
- S2. El-Mahdy, A. F. M.; Young, C.; Kim, J.; You, J.; Yamauchi, Y.; Kuo, S. W. Hollow Microspherical and Microtubular [3 + 3] Carbazole-Based Covalent Organic Frameworks and Their Gas and Energy Storage Applications. *ACS Appl. Mater. Interfaces* **2019**, *11*, 9343–9354.
- S3. DeBlase, C. R.; Silberstein, K. E.; Truong, T.-T.; Abruña, H. D.; Dichtel, W. R.;  $\beta$ -Ketoenamine-Linked Covalent Organic Frameworks Capable of Pseudocapacitive Energy Storage. *J. Am. Chem. Soc.*, **2013**, *135*, 16821–16824.
- S4. Alabadi, A.; Yang, X.; Dong, Z.; Li, Z.; Tan, B.; Nitrogen-doped activated carbons derived from a co-polymer for high supercapacitor performance. *J. Mater. Chem. A*, **2014**, *2*, 11697–11705.
- S5. EL-Mahdy, A. F. M.; Kuo, C.-H.; Alshehri, A. Young, C.; Yamauchi, Y.; Kim, J.; Kuo, S.-W.; Strategic design of triphenylamine- and triphenyltriazine-based two-dimensional covalent organic frameworks for CO<sub>2</sub> uptake and energy storage. *J. Mater. Chem. A*, **2018**, *6*, 19532–19541.
- S6. Khattak, A. M.; Ghazi, Z. A.; Liang, B.; Khan, N. A.; Iqbal, A.; Li, L.; Tang, Z. A redox-active 2D covalent organic framework with pyridine moieties capable of faradaic energy storage. *J. Mater. Chem. A*, **2016**, *4*, 16312–16317.
- S7. EL-Mahdy, A. F. M.; Hung, Y. -H.; Mansoure, T. H.; Yu, H. -H.; Hsu, Y. -S.; Wu, K. C. - W.; Kuo, S. -W. Synthesis of [3 + 3]  $\beta$ -ketoenamine-tethered covalent organic frameworks (COFs) for high-performance supercapacitance and CO<sub>2</sub> storage. *J. Taiwan Inst. Chem. Eng.* **2019**, *103*, 199–208.
